RESEARCH ARTICLE

# Dialysis Patients with Implanted Drug-Eluting Stents Have Lower Major Cardiac Events and Mortality than Those with Implanted Bare-Metal Stents: A Taiwanese Nationwide Cohort Study

Hsin-Fu Lee<sup>1</sup>, Lung-Sheng Wu<sup>1</sup>, Yi-Hsin Chan<sup>1</sup>, Cheng-Hung Lee<sup>1</sup>, Jia-Rou Liu<sup>2</sup>, Hui-Tzu Tu<sup>2</sup>, Ming-Shien Wen<sup>1</sup>, Chi-Tai Kuo<sup>1</sup>, Wei-Jan Chen<sup>1</sup>, Yung-Hsin Yeh<sup>1</sup>, Lai-Chu See<sup>2,3\*</sup>, Shang-Hung Chang<sup>1\*</sup>

**1** Chang Gung University and Department of Cardiology, Chang Gung Memorial Hospital, Taipei, Taiwan, **2** Department of Public Health, College of Medicine, Chang Gung University, Taoyuan, Taiwan, **3** Biostatistics Core Laboratory, Molecular Medicine Research Center, Chang Gung University, Taoyuan, Taiwan

\* [lichu@mail.cgu.edu.tw](mailto:lichu@mail.cgu.edu.tw) (LCS); [afen.chang@gmail.com](mailto:afen.chang@gmail.com) (SHC)

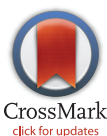

**OPEN ACCESS**

**Citation:** Lee H-F, Wu L-S, Chan Y-H, Lee C-H, Liu J-R, Tu H-T, et al. (2016) Dialysis Patients with Implanted Drug-Eluting Stents Have Lower Major Cardiac Events and Mortality than Those with Implanted Bare-Metal Stents: A Taiwanese Nationwide Cohort Study. *PLoS ONE* 11(1): e0146343. doi:10.1371/journal.pone.0146343

**Editor:** Yoshiaki Taniyama, Osaka University Graduate School of Medicine, JAPAN

**Received:** September 7, 2015

**Accepted:** November 15, 2015

**Published:** January 5, 2016

**Copyright:** © 2016 Lee et al. This is an open access article distributed under the terms of the [Creative Commons Attribution License](https://creativecommons.org/licenses/by/4.0/), which permits unrestricted use, distribution, and reproduction in any medium, provided the original author and source are credited.

**Data Availability Statement:** The data are from the National Health Insurance Research Database, Taiwan (<http://nhird.nhri.org.tw/en/>).

**Funding:** This research was supported by the Chang Gung Memorial Hospital Linkou Medical Center, grant number CMRPG3B1691, to S.H. Chang (<https://www.cgmh.org.tw/eng2002/index.asp>). The funders had no role in study design, data collection and analysis, decision to publish, or preparation of the manuscript.

## Abstract

### Objective

To investigate the efficacy and long-term clinical benefits of DES for dialysis patients.

### Background

It is unclear whether percutaneous coronary intervention (PCI) with drug-eluting stent (DES) implantation is associated with lower rates of major adverse cardiovascular events (MACE) or mortality compared to bare-metal stents (BMS).

### Methods

From a nationwide cohort selected from Taiwan's National Health Insurance Research Database, we enrolled 2,835 dialysis patients who were hospitalized for PCI treatment with stent implantation from Dec 1, 2006. Follow-up was from the date of index hospitalization for PCI until the first MACE, date of death, or December 31, 2011, whichever came first.

### Results

A total of 738 patients (26.0%) had DES implanted, and 2,097 (74%) had BMS implanted. The median time to the first MACE was 0.53 years (interquartile range: 0.89 years; range: 0–4.62 years). At 1-year follow-up, patients treated with BMS had significantly, non-fatal myocardial infarction (MI), all-cause mortality, and composite MACE compared to those treated with DES. The overall repeat revascularization with coronary artery bypass graft (CABG), non-fatal MI, all-cause mortality, and composite MACE were significantly lower in

**Competing Interests:** The authors have declared that no competing interests exist.

patients treated with DES than those treated with BMS. Multivariate cox regression analysis showed that older age, history of diabetes, history of heart failure, history of stroke, and DES vs. BMS were independent significant predictors of MACE.

## Conclusions

DES implantation conferred survival benefits in dialysis patients compared with BMS implantation.

## Introduction

Coronary artery disease (CAD) is prevalent in more than 50% of patients with end-stage renal disease (ESRD) who are on hemodialysis [1]. The presence of complex lesions such as massive calcification of coronary lesions, and multi-vessel disease increases the risk of death in these patients compared with non-dialysis patients [2–5]. Coronary angioplasty with stenting has been proven to be an effective treatment for CAD in the ESRD population. However, the use of coronary stents in dialysis patients is still under debate because this population has been consistently excluded from large studies which compared the efficacy of drug-eluting stents (DES) to bare-metal stents (BMS) [6–9]. The increased levels of coronary calcification and arterial stiffness in the ESRD population may increase the severity of vascular injury after either angioplasty or stenting, predisposing them to restenosis [10, 11]. Furthermore, dialysis is associated with the activation of the coagulation system, increased platelet aggregation [12], induced inflammatory response [13], and the release of oxidant free radicals [14], which may contribute to neointimal hyperplasia. The anti-proliferation effect of DES should be useful in this situation. However, calcification could diminish the biological effects of anti-proliferative drugs due to suboptimal drug delivery and absorption [15], so calcification may attenuate the efficacy of DES. Data for DES use in dialysis patients are scarce, observational in nature, and based on retrospective analyses of small cohorts [16–23]. Additionally, these studies are too weak to offer dependable conclusions. We therefore conducted this nationwide dynamic cohort study using data from the Taiwan National Health Insurance Research Database (NHIRD) to investigate the efficacy and long-term clinical benefits of DES for dialysis patients.

## Methods

### Data source

The National Health Insurance (NHI) program in Taiwan provides compulsory universal health insurance to 98% of the population (22.6 million of a total of 23 million people). The program, which was implemented in 1995, covers all forms of health care services. The National Health Insurance Administration (NHIA) and the National Health Research Institute (NHRI) jointly manage and maintain all insurance claim data in the NHIRDS. The NHIRDS contain comprehensive information for all enrollees, including birth date, gender, diagnostic codes, surgery or procedures received, medications prescribed, admission date, hospitalization, discharge date, medical institutions codes, and claim amounts. Routine auditing of claims by the NHIA helps ensure the accuracy and validity of NHIRD data [24–26]. Disease diagnoses are coded according to the *International Classification of Disease, Ninth Revision, Clinical Modification* (ICD-9-CM). The diagnosis of ESRD was assigned to chronic kidney disease patients with dialysis. In Taiwan, patients with ESRD are eligible for a catastrophic illness certificate

after being reviewed by two specialists based on clinical presentations and laboratory studies. Percutaneous coronary intervention (PCI) is reimbursed by the NHI, and the NHIRD maintains a record of patients with CAD who receive PCI with BMS or DES implants. Note that the first DES was reimbursed by Taiwan NHI in Dec 2006. We conducted a secondary data analysis using the NHIRDs and restricted the study period to between December 1, 2006, and December 31, 2011. This study was approved by the Ethics Institutional Review Board of Chang Gung Memorial Hospital. Informed consent was waived because the identification number of each patient had already been encrypted for privacy protection.

## Study Design

We used a nationwide cohort of Taiwanese patients who had been diagnosed with ESRD between December 1, 2006 and December 31, 2011. All enrolled patients were admitted for PCI, and followed up until 2011. Patients were excluded if 1) they had received PCI without stent implantation, 2) they had previously received coronary artery bypass graft (CABG) surgery, or they had received PCI and CABG on the same day, 3) died while hospitalized, 4) had DES as well as BMS implantations during the same procedure, 5) had been diagnosed with cancer before they received PCI, or 6) their diagnosis, PCI, or medication data were missing (Fig 1).

## Outcomes and covariate measurements

Variables associated with adverse outcome for patients undergoing PCI were selected for analysis [27, 28]. Co-morbidities at the time of PCI were identified by ICD-9-CM diagnosis codes and medication during index hospitalization. The following outcomes were major adverse cardiovascular events (MACEs): 1) all-cause mortality, 2) hospitalization and principal diagnosis of myocardial infarction (MI) (ICD-9-CM code 410.x), 3) repeat revascularization for PCI or CABG, and 4) hospitalization and principal diagnosis of stroke (ICD-9-CM code 430–437). Subjects were followed up from the date of index hospitalization for PCI to the date of the first MACE, date of death, or December 31, 2011, whichever came first.

## Statistical analysis

The chi-square test or unpaired t-test was used to compare data between the DES and BMS study groups in the univariate analysis, where appropriate. The event-free rates for the first events were calculated using the Kaplan-Meier method. We used Cox proportional hazards models to assess univariate and multivariable covariates associated with progression of all patients to the endpoints. All prognostic variables with  $P < 0.05$  in univariate analysis and forward selection was used to determine the final Cox's model to determine independent predictors. Hazard ratios (HRs) and their 95% confidence intervals (CIs) were computed. The assumption of proportional hazards was validated by plotting  $\ln[-\ln(\text{survival function})]$  against  $\ln(\text{follow-up time})$ . The two lines in this plot are parallel, validating the assumption of proportional hazards (result not shown). The significance level of this study was 0.05.

## Result

A total of 2,835 dialysis patients who had PCI treatment with stent implantation were eligible for this study (Fig 1). The mean age ( $\pm$ standard deviation) of the patients was  $64.5 \pm 11.0$  years, and the study population included 58.3% males. The mean duration from dialysis to the first PCI was  $3.72 \pm 3.25$  years. About one quarter of the subjects ( $n = 738$ , 26.0%) received DES, and 2,097 (74%) received BMS. The DES group had a significantly higher prevalence of

**167,372** patients with ESRD under dialysis between **1995 and 2011** were identified

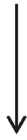

**15,523** ESRD patients had received PCI

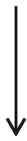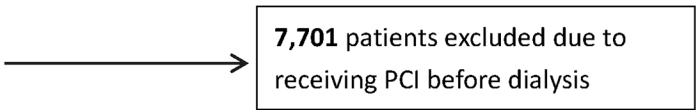

**7,701** patients excluded due to receiving PCI before dialysis

**7,822** ESRD patients admitted who received PCI

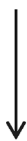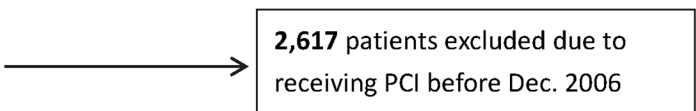

**2,617** patients excluded due to receiving PCI before Dec. 2006

**5,205** ESRD patients admitted who received PCI

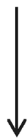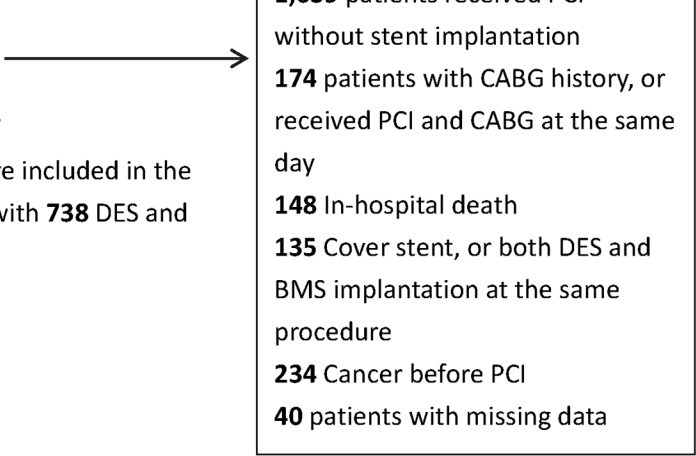

**1,639** patients received PCI without stent implantation  
**174** patients with CABG history, or received PCI and CABG at the same day  
**148** In-hospital death  
**135** Cover stent, or both DES and BMS implantation at the same procedure  
**234** Cancer before PCI  
**40** patients with missing data

**2,835** patients were included in the cohort study: PCI with **738** DES and **2097** BMS

ESRD, end-stage renal disease; PCI, percutaneous coronary intervention; CABG, coronary artery bypass

graft; DES, drug-eluting stent; BMS, bare-metal stent.

**Fig 1. Flow chart of enrollment.**

doi:10.1371/journal.pone.0146343.g001

dyslipidemia and use of statins compared to the BMS group (82.7% vs. 76.1%,  $P = 0.0002$ ; 34.8% vs. 29.8%,  $P = 0.0105$ , respectively). However, the BMS group had a significantly higher frequency of strokes compared to the DES group (43.0% vs. 37.9%,  $P = 0.0162$ ). The DES group had a slightly but significantly lower number of stent implantations than the BMS group ( $1.1 \pm 0.4$  vs.  $1.2 \pm 0.5$ ,  $P < 0.0001$ ). There was no significant difference in age, sex, hypertension, diabetes mellitus, atrial fibrillation, congestive heart failure, acute coronary syndrome (ACS), previous gastrointestinal (GI) bleeding, and prescribed medication between the two study groups (Table 1).

**Table 1. Patient demographics, co-morbidities, and stent characteristics at stent implantation among dialysis patients.**

|                             | Total        | DES group   | BMS group    | P value                                  |
|-----------------------------|--------------|-------------|--------------|------------------------------------------|
| <b>Number of patient</b>    | 2,835        | 738         | 2,097        |                                          |
| <b>Demographic</b>          |              |             |              |                                          |
| Age, years                  | 64.5±11.0    | 64.9 ± 10.7 | 64.4± 11.1   | 0.2340 <sup>1</sup> /0.1939 <sup>2</sup> |
| 0–49, n (%)                 | 253 (8.9)    | 50 (6.8)    | 203 (9.7)    |                                          |
| 50–64, n (%)                | 1,160 (40.9) | 311 (42.1)  | 849 (40.5)   |                                          |
| 65–74, n (%)                | 833 (29.4)   | 217 (29.4)  | 616 (29.4)   |                                          |
| 75–84, n (%)                | 514 (18.1)   | 141 (19.1)  | 373 (17.8)   |                                          |
| 85+, n (%)                  | 75 (2.7)     | 19 (2.6)    | 56 (2.7)     |                                          |
| Male, n (%)                 | 1,652 (58.3) | 446 (60.4)  | 1,206 (57.5) | 0.1661 <sup>2</sup>                      |
| <b>Co-morbidities</b>       |              |             |              |                                          |
| Hypertension, n (%)         | 2,784 (98.2) | 727 (98.5)  | 2,057 (98.1) | 0.4636 <sup>2</sup>                      |
| DM, n(%)                    | 2,275 (80.3) | 599 (81.1)  | 1,676 (79.9) | 0.4662 <sup>2</sup>                      |
| Dyslipidemia, n (%)         | 2,205 (77.8) | 610 (82.7)  | 1,595 (76.1) | 0.0002 <sup>2</sup>                      |
| CHF, n (%)                  | 1,461 (51.5) | 362 (49.1)  | 1,099 (52.4) | 0.1166 <sup>2</sup>                      |
| Previous Stroke, n (%)      | 1,182 (41.7) | 280 (37.9)  | 902 (43.0)   | 0.0162 <sup>2</sup>                      |
| ACS, n (%)                  | 773 (27.3)   | 190 (25.8)  | 583 (27.8)   | 0.2806 <sup>2</sup>                      |
| Atrial fibrillation, n (%)  | 203 (7.2)    | 48 (6.5)    | 155 (7.4)    | 0.4213 <sup>2</sup>                      |
| Previous GI bleeding, n (%) | 115 (4.1)    | 28 (3.8)    | 87 (4.2)     | 0.6744 <sup>2</sup>                      |
| <b>Medication</b>           |              |             |              |                                          |
| Aspirin, n (%)              | 2,333 (82.3) | 620 (84.0)  | 1,713 (81.7) | 0.1551 <sup>2</sup>                      |
| Clopidogrel, n (%)          | 2,793 (98.2) | 729 (98.8)  | 2,064 (98.4) | 0.4934 <sup>2</sup>                      |
| ACEI/ARB, n (%)             | 1,348 (47.6) | 367 (49.7)  | 981 (46.8)   | 0.1678 <sup>2</sup>                      |
| Beta-blocker, n (%)         | 1,038 (36.6) | 276 (37.4)  | 762 (36.3)   | 0.6069 <sup>2</sup>                      |
| Statin, n (%)               | 881 (30.1)   | 257 (34.8)  | 624 (29.8)   | 0.0105 <sup>2</sup>                      |
| <b>Stent Implantation</b>   |              |             |              |                                          |
| No. of vessels intervened   |              |             |              | 0.0190 <sup>3</sup>                      |
| 1 vessel, n (%)             | 1,867 (65.6) | 465 (63.0)  | 1,402 (66.9) |                                          |
| 2 vessels, n (%)            | 849 (30.0)   | 232 (31.4)  | 617 (29.4)   |                                          |
| 3 vessels, n (%)            | 119 (4.2)    | 41 (5.6)    | 78 (3.7)     |                                          |
| Number of stents implanted  |              |             |              | <0.0001 <sup>3</sup>                     |
| 1 stent, n (%)              | 2,365 (83.4) | 662 (89.7)  | 1,703 (81.2) |                                          |
| 2 stents, n (%)             | 394 (13.9)   | 66 (8.9)    | 328 (15.6)   |                                          |
| 3 stents, n (%)             | 68 (2.4)     | 7 (1.0)     | 61 (2.9)     |                                          |
| 4 stents, n (%)             | 8 (0.3)      | 3 (0.4)     | 5 (0.2)      |                                          |

P values were calculated with the use of <sup>1</sup>independent t test, <sup>2</sup>chi-square test and <sup>3</sup>chi-square test for trend.

Values are expressed as mean ± standard deviation or number (percentage).

DES, drug-eluting stent; BMS, bare-metal stent; ACS, acute coronary syndrome; DM, diabetes mellitus; CHF, congestive heart failure; GI, gastrointestinal; ACEI, angiotensin converting enzyme inhibitor; ARB, angiotensin receptor blocker.

doi:10.1371/journal.pone.0146343.t001

The mean follow-up duration was  $2.06 \pm 0.08$  years in the DES group and  $1.89 \pm 0.04$  years in the BMS group. The mean time to the first cardiac event was 0.53 year (interquartile range: 0.89 years; range: 0–4.62 years). At the 1-year follow-up, patients who received BMS had significantly higher non-fatal MI (6.1% vs. 3.8%,  $P = 0.0177$ ), all-cause mortality (12.6% vs. 8.7%,  $P < 0.0001$ ), and composite MACE (40.2% vs. 32.5%,  $P = 0.0012$ ) compared to those treated with DES. In addition, the BMS group had a significantly higher overall repeat revascularization with CABG (1.6% vs. 0.5%,  $P = 0.0277$ ), non-fatal MI (7.5% vs. 5.0%,  $P = 0.0266$ ), all-cause mortality (19.3% vs. 13.8%,  $P = 0.0004$ ), and composite MACE (55.8% vs. 47.2%,  $P = 0.0022$ ) compared to the DES group (Table 2). Kaplan-Meier curves were plotted and showed a lower rate of MACE and all-cause mortality in the DES group than the BMS group (Figs 2 and 3).

Univariate analysis showed that older age, history of diabetes, history of heart failure, history of stroke, ACS, and DES vs. BMS were significant predictors of MACE. After adjusting for confounders, multivariate analysis showed that older age, history of diabetes (HR = 1.296, 95% CI = 1.134–1.482), history of heart failure (HR = 1.231, 95% CI = 1.112–1.364), history of stroke (HR = 1.118, 95% CI = 1.007–1.240), ACS (HR = 1.333, 95% CI = 1.194–1.489), and DES vs. BMS (HR = 0.837, 95% CI = 0.743–0.944) were independent significant predictors of MACE (Table 3).

The duration of aspirin use was  $190.6 \pm 195.8$  days in the DES group and  $172.4 \pm 199.5$  days in the BMS group ( $P = 0.051$ ). The duration of clopidogrel use was  $166.7 \pm 165.1$  days in the DES group and  $132.1 \pm 150.2$  days in the BMS group ( $P < 0.001$ ). GI bleeding rate after implantation of stent was 1.49% in the DES group and 1.96% in the BMS group ( $P = 0.4118$ ).

## Discussion

To our knowledge, there are currently no data available from prior large-scale cohort studies or randomized controlled trials comparing the outcome of MACEs or mortality among dialysis patients following PCI with DES versus BMS. This study identified an association between a

**Table 2. One year and overall major adverse cardiac events (MACEs) after stent implantation.**

|                                | Total        | DES group  | BMS group   | P value |
|--------------------------------|--------------|------------|-------------|---------|
| Number of patient              | 2,835        | 738        | 2,097       |         |
| One-Year MACE, n (%)           | 1,082 (38.2) | 240 (32.5) | 842 (40.2)  | 0.0012  |
| Death from any cause           | 328 (11.6)   | 64 (8.7)   | 344 (12.6)  | <0.0001 |
| Non-fatal MI                   | 155 (5.5)    | 28 (3.8)   | 127 (6.1)   | 0.0177  |
| Repeat revascularization-PCI   | 488 (17.2)   | 125 (16.9) | 363 (17.3)  | 0.6446  |
| Repeat revascularization-CABG  | 24 (0.9)     | 3 (0.4)    | 21 (1.0)    | 0.1213  |
| Stroke                         | 87 (3.1)     | 20 (2.7)   | 67 (3.2)    | 0.4584  |
| Overall MACE, n (%)            | 1,519(53.6)  | 348(47.2)  | 1,171(55.8) | 0.0022  |
| Incidence per 100 person-years | 48.23        | 42.06      | 50.43       |         |
| Death from any cause           | 506 (17.9)   | 102 (13.8) | 404 (19.3)  | 0.0004  |
| Non-fatal MI                   | 194 (6.8)    | 37 (5.0)   | 157 (7.5)   | 0.0226  |
| Repeat revascularization-PCI   | 651 (23.0)   | 175 (23.7) | 476 (22.7)  | 0.7965  |
| Repeat revascularization-CABG  | 38 (1.3)     | 4 (0.5)    | 34 (1.6)    | 0.0277  |
| Stroke                         | 130 (4.6)    | 30 (4.1)   | 100 (4.8)   | 0.3944  |

P values was calculated with the use of log-rank test.

Values are expressed as number (percentage).

MI, myocardial infarction; PCI, percutaneous coronary intervention; CABG, coronary artery bypass graft.

doi:10.1371/journal.pone.0146343.t002

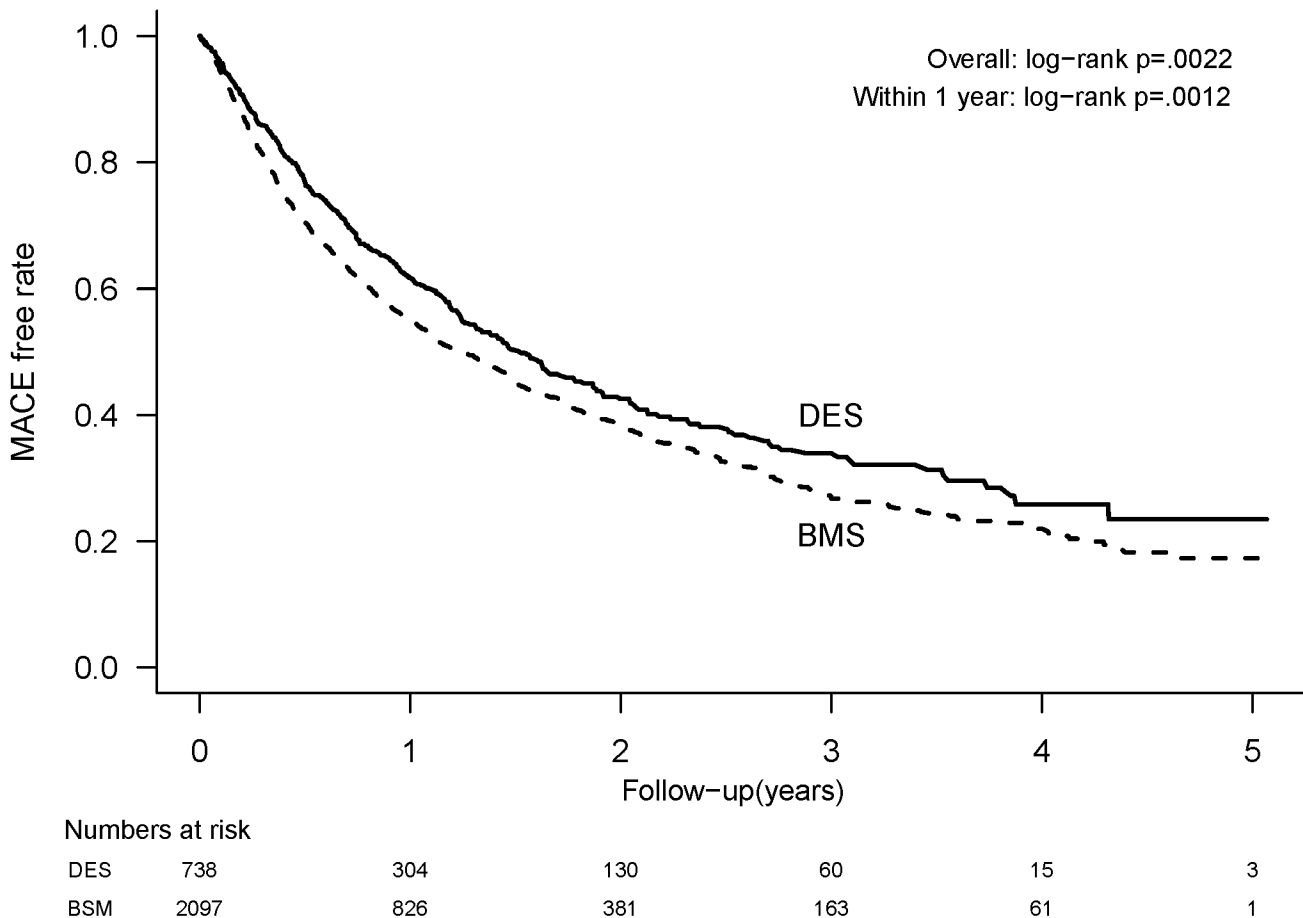

**Fig 2. MACE-free rates among dialysis patients after implantation of drug-eluting stents (DES) or bare-metal stents (BMS).**

doi:10.1371/journal.pone.0146343.g002

lower rate of MACE in dialysis patients in the DES group than those in the BMS group. This difference persisted after adjusting for important confounders. The superior efficacy of DES appears to be predominantly in the improvement of all-cause mortality.

The baseline characteristics of patients in the DES and BMS groups were obviously heterogeneous and it is possible that many of these might have an impact on the outcomes measured. For example, the number of stent implantations was slightly, but significantly higher in the BMS group. Stent implantation number was previously shown to be an independent predictor of restenosis and stent thrombosis [29, 30]. Our data showing that patients in the BMS group had a higher incidence of prior strokes, which could have been associated with higher MACE, were also consistent with previous findings [27, 28]. Although the percentage of ACS was not significantly different among the groups, ACS was a significant prognostic predictor for the MACE after stent implantation; which is compatible with a historical study [31]. In addition, patients with chronic kidney disease including dialysis population presenting with ACS were associated with increased risk of death and MI [32].

Although 12 months of dual antiplatelet therapies (DAPT) for ACS patients or after DES implantation were followed by current guidelines [33], the duration was according to the clinical judgment of physicians in the cohort study. Because a higher MACE rate contributing to early discontinuation of DAPT and individualized drug therapy in our study groups, the duration of DAPT was less than 12 months.

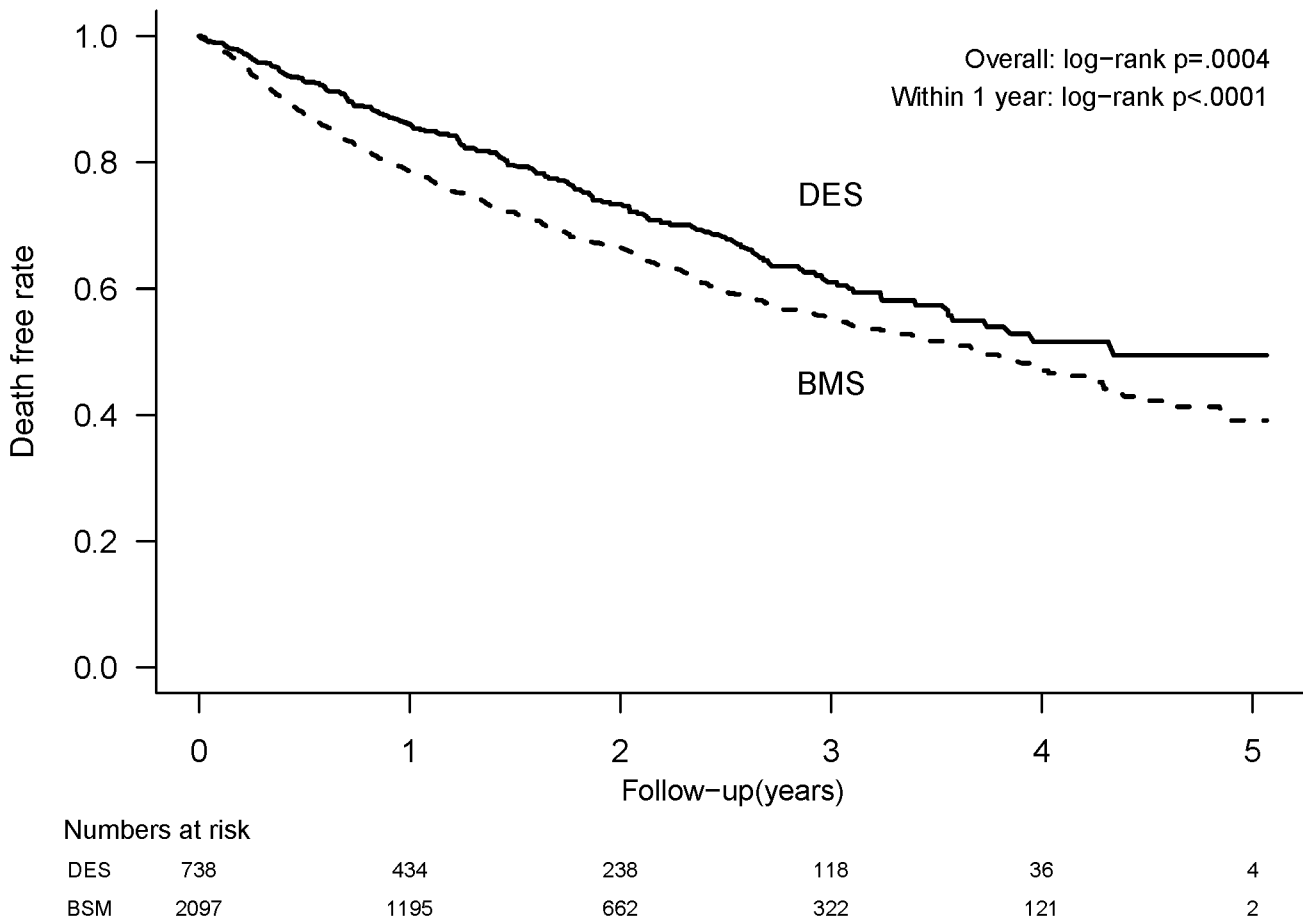

**Fig 3. Survival rates among dialysis patients after implantation of drug-eluting stents (DES) or bare-metal stents (BMS).**

doi:10.1371/journal.pone.0146343.g003

Bleeding complication has been well studied with antiplatelet treatment, especially with dual antiplatelet therapies. We analyzed GI bleeding which is one of the most common bleeding complications in patients receiving antiplatelet therapy [34, 35]. In addition, high risk of GI bleeding has been observed for dialysis patients [36], a longer duration of dual antiplatelet agents, which is commonly advised for DES implanted patients, may be associated with higher risk of GI bleeding. Although the DES group had a longer duration of using antiplatelet agents in our cohort, there was still no significant difference of GI bleeding after stent implantation between the DES and BMS groups. Higher MACE rates in our study groups leading to the under detection of possibly later end-point of GI bleeding, or the potential confounding of unmeasured factor like proton-pump inhibitor use may have interfered with the analysis.

Unlike other studies in which follow-up angiography was used to analyze the risk of target lesion or target vessel revascularization (TLR or TVR), our cohort came with data about ischemia-driven revascularization of PCI or CABG. Our data offered a realistic view of what is observed in the clinic. However, since silent myocardial ischemia may be prevalent in this population [1], our present study may have underestimated the efficacy of DES in reducing the risk of restenosis which was previously observed in other studies [18, 23]. This could be why our data did not show a significant difference in repeat revascularization for PCI between the DES and the BMS groups. However, patients in the DES group had a lower risk of repeat revascularization for CABG. This was possibly because patients with severe CAD who were also



**Table 3. Univariate and multivariate analysis of major adverse cardiac events (MACEs) among dialysis patients after stent implantation.**

|                            | Univariate analysis |         | Multivariate analysis |         |
|----------------------------|---------------------|---------|-----------------------|---------|
|                            | HR (95% CI)         | P value | HR (95% CI)           | P value |
| Age, years                 |                     |         |                       |         |
| 20–49                      | 0.868 (0.715–1.054) | 0.1537  | 0.895 (0.736–1.087)   | 0.2632  |
| 50–64                      | reference group     | -       |                       |         |
| 65–74                      | 1.138 (1.008–1.284) | 0.0366  | 1.095 (0.969–1.237)   | 0.1456  |
| 75–84                      | 1.240 (1.077–1.428) | 0.0028  | 1.186 (1.028–1.369)   | 0.0195  |
| 85+                        | 1.654 (1.228–2.227) | 0.0009  | 1.535 (1.138–2.071)   | 0.0050  |
| Male                       | 1.095 (0.987–1.221) | 0.0865  |                       |         |
| Hypertension               | 1.086 (0.752–1.569) | 0.6585  |                       |         |
| DM                         | 1.302 (1.140–1.487) | < .0001 | 1.296 (1.134–1.482)   | 0.0001  |
| Dyslipidemia               | 0.998 (0.885–1.127) | 0.9791  |                       |         |
| CHF                        | 1.255 (1.134–1.388) | < .0001 | 1.231 (1.112–1.364)   | < .0001 |
| Previous Stroke            | 1.186 (1.072–1.312) | 0.0010  | 1.115 (1.005–1.238)   | 0.0401  |
| ACS                        | 1.349 (1.208–1.506) | < .0001 | 1.333 (1.194–1.489)   | < .0001 |
| AF                         | 1.146 (0.950–1.382) | 0.1547  |                       |         |
| Previous GI bleeding       | 0.963 (0.745–1.244) | 0.7725  |                       |         |
| Aspirin                    | 0.941 (0.827–1.071) | 0.3555  |                       |         |
| Clopidogrel                | 0.863 (0.577–1.292) | 0.4745  |                       |         |
| ACEI/ARB                   | 0.979 (0.885–1.083) | 0.6826  |                       |         |
| Beta-blocker               | 0.961 (0.866–1.067) | 0.4569  |                       |         |
| Statin                     | 0.956 (0.856–1.066) | 0.4160  |                       |         |
| No. of vessels intervened  |                     |         |                       |         |
| 1 vessel                   | reference group     | -       |                       |         |
| 2 vessels                  | 1.105 (0.991–1.233) | 0.0726  |                       |         |
| 3 vessels                  | 0.973 (0.753–1.258) | 0.8364  |                       |         |
| Number of stents implanted |                     |         |                       |         |
| 1 stent                    | reference group     | -       |                       |         |
| 2 stents                   | 1.092 (0.944–1.264) | 0.2348  |                       |         |
| 3 stents                   | 1.190 (0.858–1.650) | 0.2982  |                       |         |
| 4 stents                   | 0.769 (0.248–2.387) | 0.6494  |                       |         |
| DES versus BMS             | 0.830 (0.736–0.935) | 0.0022  | 0.837 (0.743–0.944)   | 0.0038  |

HR, hazard ratio; CI, confidence interval; DM, diabetes mellitus; AF, atrial fibrillation; CHF, congestive heart failure; ACS, acute coronary syndrome; GI, gastrointestinal; ACEI, angiotensin converting enzyme inhibitor; ARB, angiotensin receptor blocker; DES, drug-eluting stent; BMS, bare-metal stent.

doi:10.1371/journal.pone.0146343.t003

candidates for CABG underwent clinical or angiographic follow-ups in quick succession, which might have influenced clinicians' judgment.

Our data, showing that DES use was associated with a reduction in myocardial infarction rates, were not supported by previously published studies [16–23]. MI was defined as hospitalization with a principal diagnosis of MI in the present study. However, other studies defined it as elevation of cardiac enzymes and/or the development of new pathological Q on electrocardiogram. Importantly, our data demonstrated that DES reduced hospitalization for MI. We believe that the definition might make a difference in the end-point measured.

This study echoes the findings of Halkin et al., reported in the National Heart, Lung and Blood Institute Dynamic Registry, that patients treated with DES had lower cumulative 1-year rates of all-cause mortality compared to those treated with BMS [22]. The mechanism

underlying higher survival rates in the DES group remain unclear. Based on previous reports that acute myocardial infarction and all other cardiac causes accounted for the majority of mortality in dialysis patients [37], we hypothesized that higher vessel patency rates afforded by DES caused less damage to the myocardium, thereby leading to a lower tendency of fatal outcomes after episodes of acute ischemia and/or arrhythmia. Our findings may have several important clinical implications: 1) Although Halkinet al. first reported the survival benefit conferred by DESs compared with BMSs, they had only a small sample size with 74 subjects (BMS  $n = 41$  and DES  $n = 33$ ). A meta-analysis study done by Abdel-Latif et al. also found a trend towards lower all-cause mortality in DES versus BMS dialysis patients [DES group ( $n = 389$ ) vs. BMS group ( $n = 480$ ) with odds ratio: 0.68; CI: 0.45 to 1.01;  $P = 0.06$ ] [38], suggesting that DES might confer a survival advantage in dialysis patients compared to BMS, 2) Dialysis patients treated with DES had lower risks of 1-year mortality compared with those treated with BMS. The DES group also had lower overall mortality rates. These data implied that dialysis patients treated with DES may have long-term survival benefits compared to those treated with BMS.

It has been previously reported that dialysis patients treated with revascularization had a survival advantage over those who are not [39, 40]. Although SYNTAX trial demonstrated the superiority of surgical revascularization in patients with complex coronary lesions, like many other cardiovascular trials, data from dialysis patients were still not available [41, 42]. However, higher risk of peri-operative complications and higher short- and medium-term mortality in dialysis patients weaken the potential long-term survival benefit of CABG [43–45]. Charytan et al. reported that CABG operative mortality for patients with ESRD was greater than 3-fold that of patients with normal kidney function. The risk of perioperative stroke was doubled in these patients, and the risk of perioperative infection was also increased significantly [43]. It is therefore important to further study the issue of PCI treatment with DES or BMS implantation.

The strengths of this study include the use of electronic records from a national health insurance registry and a uniform approach to outcome ascertainment. However, this study has some limitations inherent in a health insurance database. First, the NHI data do not include information about the severity and complexity of disease, such as lesions involving left main coronary artery, chronic total occlusion, bifurcation lesions, and the SYNTAX score. Second, they also do not include information about procedural characteristics such as total stent length, stent diameter, and whether there was a complete revascularization or not. It is possible that the missing information might have affected the outcome. Third, there were no data about follow-up angiographic results and restenosis. Therefore, strictly randomized controlled trials would help clarify the efficacy of DES.

In conclusion, this cohort study identified some survival advantages of DES over BMS implantation for dialysis patients. Both 1-year and overall composite MACE and mortality were significantly higher in the BMS group. However, it is important to validate this hypothesis in a larger, randomized trial with long-term follow-up.

## Acknowledgments

We thank all the subjects and staff involved in this study for their cooperation. The Chang Gung Memorial Hospital Linkou Medical Center provided grant support for this research. No potential conflicts of interest relevant to this article were reported.

## Author Contributions

Conceived and designed the experiments: HFL LSW YHC SHC. Performed the experiments: CHL MSW CTK WJC YHY. Analyzed the data: HFL JRL HTT LCS SHC. Contributed

reagents/materials/analysis tools: HFL LSW YHC SHC. Wrote the paper: HFL LSW YHC SHC.

## References

- Ohtake T, Kobayashi S, Moriya H, Negishi K, Okamoto K, Maesato K, et al. High prevalence of occult coronary artery stenosis in patients with chronic kidney disease at the initiation of renal replacement therapy: an angiographic examination. *Journal of the American Society of Nephrology: JASN*. 2005; 16(4):1141–8. Epub 2005/03/04. doi: [10.1681/ASN.2004090765](https://doi.org/10.1681/ASN.2004090765) PMID: [15743997](https://pubmed.ncbi.nlm.nih.gov/15743997/).
- Otsuka Y, Ishiwata S, Inada T, Kanno H, Kyo E, Hayashi Y, et al. Comparison of haemodialysis patients and non-haemodialysis patients with respect to clinical characteristics and 3-year clinical outcomes after sirolimus-eluting stent implantation: insights from the Japan multi-centre post-marketing surveillance registry. *European heart journal*. 2011; 32(7):829–37. Epub 2011/01/05. doi: [10.1093/eurheartj/ehq480](https://doi.org/10.1093/eurheartj/ehq480) PMID: [21196442](https://pubmed.ncbi.nlm.nih.gov/21196442/).
- Herzog CA, Ma JZ, Collins AJ. Comparative survival of dialysis patients in the United States after coronary angioplasty, coronary artery stenting, and coronary artery bypass surgery and impact of diabetes. *Circulation*. 2002; 106(17):2207–11. Epub 2002/10/23. PMID: [12390949](https://pubmed.ncbi.nlm.nih.gov/12390949/).
- Cheung AK, Sarnak MJ, Yan G, Dwyer JT, Heyka RJ, Rocco MV, et al. Atherosclerotic cardiovascular disease risks in chronic hemodialysis patients. *Kidney international*. 2000; 58(1):353–62. Epub 2000/07/08. doi: [10.1046/j.1523-1755.2000.00173.x](https://doi.org/10.1046/j.1523-1755.2000.00173.x) PMID: [10886582](https://pubmed.ncbi.nlm.nih.gov/10886582/).
- Herzog CA, Ma JZ, Collins AJ. Poor long-term survival after acute myocardial infarction among patients on long-term dialysis. *The New England journal of medicine*. 1998; 339(12):799–805. Epub 1998/09/17. doi: [10.1056/NEJM199809173391203](https://doi.org/10.1056/NEJM199809173391203) PMID: [9738087](https://pubmed.ncbi.nlm.nih.gov/9738087/).
- Coca SG, Krumholz HM, Garg AX, Parikh CR. Underrepresentation of renal disease in randomized controlled trials of cardiovascular disease. *Jama*. 2006; 296(11):1377–84. Epub 2006/09/21. doi: [10.1001/jama.296.11.1377](https://doi.org/10.1001/jama.296.11.1377) PMID: [16985230](https://pubmed.ncbi.nlm.nih.gov/16985230/).
- Stone GW, Ellis SG, Cox DA, Hermiller J, O'Shaughnessy C, Mann JT, et al. A polymer-based, paclitaxel-eluting stent in patients with coronary artery disease. *The New England journal of medicine*. 2004; 350(3):221–31. Epub 2004/01/16. doi: [10.1056/NEJMoa032441](https://doi.org/10.1056/NEJMoa032441) PMID: [14724301](https://pubmed.ncbi.nlm.nih.gov/14724301/).
- Moses JW, Leon MB, Popma JJ, Fitzgerald PJ, Holmes DR, O'Shaughnessy C, et al. Sirolimus-eluting stents versus standard stents in patients with stenosis in a native coronary artery. *The New England journal of medicine*. 2003; 349(14):1315–23. Epub 2003/10/03. doi: [10.1056/NEJMoa035071](https://doi.org/10.1056/NEJMoa035071) PMID: [14523139](https://pubmed.ncbi.nlm.nih.gov/14523139/).
- Morice MC, Serruys PW, Sousa JE, Fajadet J, Ban Hayashi E, Perin M, et al. A randomized comparison of a sirolimus-eluting stent with a standard stent for coronary revascularization. *The New England journal of medicine*. 2002; 346(23):1773–80. Epub 2002/06/07. doi: [10.1056/NEJMoa012843](https://doi.org/10.1056/NEJMoa012843) PMID: [12050336](https://pubmed.ncbi.nlm.nih.gov/12050336/).
- Hoffmann R, Mintz GS, Mehran R, Kent KM, Pichard AD, Satler LF, et al. Tissue proliferation within and surrounding Palmaz-Schatz stents is dependent on the aggressiveness of stent implantation technique. *The American journal of cardiology*. 1999; 83(8):1170–4. Epub 1999/04/24. PMID: [10215278](https://pubmed.ncbi.nlm.nih.gov/10215278/).
- Schwartz RS, Murphy JG, Edwards WD, Camrud AR, Vliestra RE, Holmes DR. Restenosis after balloon angioplasty. A practical proliferative model in porcine coronary arteries. *Circulation*. 1990; 82(6):2190–200. Epub 1990/12/01. PMID: [2146991](https://pubmed.ncbi.nlm.nih.gov/2146991/).
- Viener A, Aviram M, Better OS, Brook JG. Enhanced in vitro platelet aggregation in hemodialysis patients. *Nephron*. 1986; 43(2):139–43. Epub 1986/01/01. PMID: [3713942](https://pubmed.ncbi.nlm.nih.gov/3713942/).
- Yao Q, Axelsson J, Heimbürger O, Stenvinkel P, Lindholm B. Systemic inflammation in dialysis patients with end-stage renal disease: causes and consequences. *Minerva urologica e nefrologica = The Italian journal of urology and nephrology*. 2004; 56(3):237–48. Epub 2004/10/07. PMID: [15467502](https://pubmed.ncbi.nlm.nih.gov/15467502/).
- Notohamiprodjo M, Andrassy K, Bommer J, Ritz E. Dialysis membranes and coagulation system. *Blood purification*. 1986; 4(1–3):130–41. Epub 1986/01/01. PMID: [2942155](https://pubmed.ncbi.nlm.nih.gov/2942155/).
- Fanelli F, Cannavale A, Gazzetti M, Lucatelli P, Wilderk A, Cirelli C, et al. Calcium burden assessment and impact on drug-eluting balloons in peripheral arterial disease. *Cardiovascular and interventional radiology*. 2014; 37(4):898–907. Epub 2014/05/09. doi: [10.1007/s00270-014-0904-3](https://doi.org/10.1007/s00270-014-0904-3) PMID: [24806955](https://pubmed.ncbi.nlm.nih.gov/24806955/).
- Meliga E, De Benedictis M, Gagnor A, Conrotto F, Novara M, Scrocca I, et al. Clinical outcomes following percutaneous coronary intervention with drug-eluting stents versus bare metal stents in patients on chronic hemodialysis. *Journal of interventional cardiology*. 2013; 26(4):351–8. Epub 2013/06/26. doi: [10.1111/joic.12034](https://doi.org/10.1111/joic.12034) PMID: [23795563](https://pubmed.ncbi.nlm.nih.gov/23795563/).
- Yachi S, Tanabe K, Tanimoto S, Aoki J, Nakazawa G, Yamamoto H, et al. Clinical and angiographic outcomes following percutaneous coronary intervention with sirolimus-eluting stents versus bare-metal stents in hemodialysis patients. *American journal of kidney diseases: the official journal of the National*

- Kidney Foundation. 2009; 54(2):299–306. Epub 2009/04/28. doi: [10.1053/j.ajkd.2009.01.263](https://doi.org/10.1053/j.ajkd.2009.01.263) PMID: [19394736](https://pubmed.ncbi.nlm.nih.gov/19394736/).
18. Kim BK, Oh S, Jeon DW, Yang JY, Kim JS, Park S, et al. Long-term clinical outcomes and stent thrombosis of sirolimus-eluting versus bare metal stents in patients with end-stage renal disease: results of Korean multicenter angioplasty team (KOMATE) Registry. *Journal of interventional cardiology*. 2009; 22(5):411–9. Epub 2009/08/26. doi: [10.1111/j.1540-8183.2009.00495.x](https://doi.org/10.1111/j.1540-8183.2009.00495.x) PMID: [19702679](https://pubmed.ncbi.nlm.nih.gov/19702679/).
  19. Okada T, Hayashi Y, Toyofuku M, Imazu M, Otsuka M, Sakuma T, et al. One-year clinical outcomes of dialysis patients after implantation with sirolimus-eluting coronary stents. *Circulation journal: official journal of the Japanese Circulation Society*. 2008; 72(9):1430–5. Epub 2008/08/30. PMID: [18724017](https://pubmed.ncbi.nlm.nih.gov/18724017/).
  20. Aoyama T, Ishii H, Toriyama T, Takahashi H, Kasuga H, Murakami R, et al. Sirolimus-eluting stents vs bare metal stents for coronary intervention in Japanese patients with renal failure on hemodialysis. *Circulation journal: official journal of the Japanese Circulation Society*. 2008; 72(1):56–60. Epub 2007/12/27. PMID: [18159100](https://pubmed.ncbi.nlm.nih.gov/18159100/).
  21. Ishio N, Kobayashi Y, Takebayashi H, Iijima Y, Kanda J, Nakayama T, et al. Impact of drug-eluting stents on clinical and angiographic outcomes in dialysis patients. *Circulation journal: official journal of the Japanese Circulation Society*. 2007; 71(10):1525–9. Epub 2007/09/27. PMID: [17895545](https://pubmed.ncbi.nlm.nih.gov/17895545/).
  22. Halkin A, Selzer F, Marroquin O, Laskey W, Detre K, Cohen H. Clinical outcomes following percutaneous coronary intervention with drug-eluting vs. bare-metal stents in dialysis patients. *The Journal of invasive cardiology*. 2006; 18(12):577–83. Epub 2007/01/02. PMID: [17197706](https://pubmed.ncbi.nlm.nih.gov/17197706/).
  23. Das P, Moliterno DJ, Charnigo R, Mukherjee D, Steinhubl SR, Sneed JD, et al. Impact of drug-eluting stents on outcomes of patients with end-stage renal disease undergoing percutaneous coronary revascularization. *The Journal of invasive cardiology*. 2006; 18(9):405–8. Epub 2006/09/07. PMID: [16954577](https://pubmed.ncbi.nlm.nih.gov/16954577/).
  24. Wu CY, Chen YJ, Ho HJ, Hsu YC, Kuo KN, Wu MS, et al. Association between nucleoside analogues and risk of hepatitis B virus-related hepatocellular carcinoma recurrence following liver resection. *Jama*. 2012; 308(18):1906–14. Epub 2012/11/20. PMID: [23162861](https://pubmed.ncbi.nlm.nih.gov/23162861/).
  25. Yang YW, Chen YH, Xirasagar S, Lin HC. Increased risk of stroke in patients with bullous pemphigoid: a population-based follow-up study. *Stroke; a journal of cerebral circulation*. 2011; 42(2):319–23. Epub 2010/12/18. doi: [10.1161/STROKEAHA.110.596361](https://doi.org/10.1161/STROKEAHA.110.596361) PMID: [21164122](https://pubmed.ncbi.nlm.nih.gov/21164122/).
  26. Wu CY, Wu MS, Kuo KN, Wang CB, Chen YJ, Lin JT. Effective reduction of gastric cancer risk with regular use of nonsteroidal anti-inflammatory drugs in *Helicobacter pylori*-infected patients. *Journal of clinical oncology: official journal of the American Society of Clinical Oncology*. 2010; 28(18):2952–7. Epub 2010/05/19. doi: [10.1200/JCO.2009.26.0695](https://doi.org/10.1200/JCO.2009.26.0695) PMID: [20479409](https://pubmed.ncbi.nlm.nih.gov/20479409/).
  27. Wu C, Camacho FT, King SB 3rd, Walford G, Holmes DR Jr., Stamato NJ, et al. Risk stratification for long-term mortality after percutaneous coronary intervention. *Circulation Cardiovascular interventions*. 2014; 7(1):80–7. Epub 2014/01/16. doi: [10.1161/CIRCINTERVENTIONS.113.000475](https://doi.org/10.1161/CIRCINTERVENTIONS.113.000475) PMID: [24425588](https://pubmed.ncbi.nlm.nih.gov/24425588/); PubMed Central PMCID: PMC PMID: [4121885](https://pubmed.ncbi.nlm.nih.gov/4121885/).
  28. O'Connor GT, Malenka DJ, Quinton H, Robb JF, Kellett MA Jr., Shubrooks S, et al. Multivariate prediction of in-hospital mortality after percutaneous coronary interventions in 1994–1996. Northern New England Cardiovascular Disease Study Group. *Journal of the American College of Cardiology*. 1999; 34(3):681–91. Epub 1999/09/14. PMID: [10483948](https://pubmed.ncbi.nlm.nih.gov/10483948/).
  29. Orford JL, Lennon R, Melby S, Fasseas P, Bell MR, Rihal CS, et al. Frequency and correlates of coronary stent thrombosis in the modern era: analysis of a single center registry. *Journal of the American College of Cardiology*. 2002; 40(9):1567–72. Epub 2002/11/13. PMID: [12427407](https://pubmed.ncbi.nlm.nih.gov/12427407/).
  30. Kastrati A, Schomig A, Elezi S, Schuhlen H, Dirschinger J, Hadamitzky M, et al. Predictive factors of restenosis after coronary stent placement. *Journal of the American College of Cardiology*. 1997; 30(6):1428–36. Epub 1997/11/15. PMID: [9362398](https://pubmed.ncbi.nlm.nih.gov/9362398/).
  31. Montalescot G, Ongen Z, Guindy R, Sousa A, Lu SZ, Pahlajani D, et al. Predictors of outcome in patients undergoing PCI. Results of the RIVIERA study. *International journal of cardiology*. 2008; 129(3):379–87. Epub 2007/12/07. doi: [10.1016/j.ijcard.2007.07.127](https://doi.org/10.1016/j.ijcard.2007.07.127) PMID: [18055032](https://pubmed.ncbi.nlm.nih.gov/18055032/).
  32. Al Suwaidi J, Reddan DN, Williams K, Pieper KS, Harrington RA, Califf RM, et al. Prognostic implications of abnormalities in renal function in patients with acute coronary syndromes. *Circulation*. 2002; 106(8):974–80. Epub 2002/08/21. PMID: [12186803](https://pubmed.ncbi.nlm.nih.gov/12186803/).
  33. Brilakis ES, Patel VG, Banerjee S. Medical management after coronary stent implantation: a review. *Jama*. 2013; 310(2):189–98. Epub 2013/07/11. doi: [10.1001/jama.2013.7086](https://doi.org/10.1001/jama.2013.7086) PMID: [23839753](https://pubmed.ncbi.nlm.nih.gov/23839753/).
  34. Yasuda H, Matsuo Y, Sato Y, Ozawa S, Ishigooka S, Yamashita M, et al. Treatment and prevention of gastrointestinal bleeding in patients receiving antiplatelet therapy. *World journal of critical care medicine*. 2015; 4(1):40–6. Epub 2015/02/17. doi: [10.5492/wjccm.v4.i1.40](https://doi.org/10.5492/wjccm.v4.i1.40) PMID: [25685721](https://pubmed.ncbi.nlm.nih.gov/25685721/); PubMed Central PMCID: PMC4326762.

35. Berger PB, Bhatt DL, Fuster V, Steg PG, Fox KA, Shao M, et al. Bleeding complications with dual anti-platelet therapy among patients with stable vascular disease or risk factors for vascular disease: results from the Clopidogrel for High Atherothrombotic Risk and Ischemic Stabilization, Management, and Avoidance (CHARISMA) trial. *Circulation*. 2010; 121(23):2575–83. Epub 2010/06/03. doi: [10.1161/CIRCULATIONAHA.109.895342](https://doi.org/10.1161/CIRCULATIONAHA.109.895342) PMID: [20516378](https://pubmed.ncbi.nlm.nih.gov/20516378/).
36. Luo JC, Leu HB, Huang KW, Huang CC, Hou MC, Lin HC, et al. Incidence of bleeding from gastroduodenal ulcers in patients with end-stage renal disease receiving hemodialysis. *CMAJ: Canadian Medical Association journal = journal de l'Association medicale canadienne*. 2011; 183(18):E1345–51. Epub 2011/11/16. doi: [10.1503/cmaj.110299](https://doi.org/10.1503/cmaj.110299) PMID: [22083684](https://pubmed.ncbi.nlm.nih.gov/22083684/); PubMed Central PMCID: PMC3255160.
37. Bloembergen WE, Port FK, Mauger EA, Wolfe RA. Causes of death in dialysis patients: racial and gender differences. *Journal of the American Society of Nephrology: JASN*. 1994; 5(5):1231–42. Epub 1994/11/01. PMID: [7873734](https://pubmed.ncbi.nlm.nih.gov/7873734/).
38. Abdel-Latif A, Mukherjee D, Mesgarzadeh P, Ziada KM. Drug-eluting stents in patients with end-stage renal disease: meta-analysis and systematic review of the literature. *Catheterization and cardiovascular interventions: official journal of the Society for Cardiac Angiography & Interventions*. 2010; 76(7):942–8. Epub 2010/05/28. doi: [10.1002/ccd.22562](https://doi.org/10.1002/ccd.22562) PMID: [20506492](https://pubmed.ncbi.nlm.nih.gov/20506492/).
39. Hemmelgarn BR, Southern D, Culleton BF, Mitchell LB, Knudtson ML, Ghali WA, et al. Survival after coronary revascularization among patients with kidney disease. *Circulation*. 2004; 110(14):1890–5. Epub 2004/09/29. doi: [10.1161/01.CIR.0000143629.55725.D9](https://doi.org/10.1161/01.CIR.0000143629.55725.D9) PMID: [15451786](https://pubmed.ncbi.nlm.nih.gov/15451786/).
40. Reddan DN, Szczech LA, Tuttle RH, Shaw LK, Jones RH, Schwab SJ, et al. Chronic kidney disease, mortality, and treatment strategies among patients with clinically significant coronary artery disease. *Journal of the American Society of Nephrology: JASN*. 2003; 14(9):2373–80. Epub 2003/08/26. PMID: [12937316](https://pubmed.ncbi.nlm.nih.gov/12937316/).
41. Mohr FW, Morice MC, Kappetein AP, Feldman TE, Stahle E, Colombo A, et al. Coronary artery bypass graft surgery versus percutaneous coronary intervention in patients with three-vessel disease and left main coronary disease: 5-year follow-up of the randomised, clinical SYNTAX trial. *Lancet*. 2013; 381(9867):629–38. Epub 2013/02/27. doi: [10.1016/S0140-6736\(13\)60141-5](https://doi.org/10.1016/S0140-6736(13)60141-5) PMID: [23439102](https://pubmed.ncbi.nlm.nih.gov/23439102/).
42. Serruys PW, Morice MC, Kappetein AP, Colombo A, Holmes DR, Mack MJ, et al. Percutaneous coronary intervention versus coronary-artery bypass grafting for severe coronary artery disease. *The New England journal of medicine*. 2009; 360(10):961–72. Epub 2009/02/21. doi: [10.1056/NEJMoa0804626](https://doi.org/10.1056/NEJMoa0804626) PMID: [19228612](https://pubmed.ncbi.nlm.nih.gov/19228612/).
43. Charytan DM, Kuntz RE. Risks of coronary artery bypass surgery in dialysis-dependent patients—analysis of the 2001 National Inpatient Sample. *Nephrology, dialysis, transplantation: official publication of the European Dialysis and Transplant Association—European Renal Association*. 2007; 22(6):1665–71. Epub 2007/02/15. doi: [10.1093/ndt/gfl835](https://doi.org/10.1093/ndt/gfl835) PMID: [17299001](https://pubmed.ncbi.nlm.nih.gov/17299001/).
44. Cooper WA, O'Brien SM, Thourani VH, Guyton RA, Bridges CR, Szczech LA, et al. Impact of renal dysfunction on outcomes of coronary artery bypass surgery: results from the Society of Thoracic Surgeons National Adult Cardiac Database. *Circulation*. 2006; 113(8):1063–70. Epub 2006/02/24. doi: [10.1161/CIRCULATIONAHA.105.580084](https://doi.org/10.1161/CIRCULATIONAHA.105.580084) PMID: [16490821](https://pubmed.ncbi.nlm.nih.gov/16490821/).
45. Liu JY, Birkmeyer NJ, Sanders JH, Morton JR, Henriques HF, Lahey SJ, et al. Risks of morbidity and mortality in dialysis patients undergoing coronary artery bypass surgery. Northern New England Cardiovascular Disease Study Group. *Circulation*. 2000; 102(24):2973–7. Epub 2000/01/11. PMID: [11113048](https://pubmed.ncbi.nlm.nih.gov/11113048/).
